# Supplementary material for: Measurement report: Airborne measurements of NO x fluxes over Los Angeles during the RECAP-CA 2021 campaign
Source: Copernicus journal article supplement (doi:10.5194/egusphere-2023-601), 2023-04-12
Supplement: Supplementary file 1 [file egusphere-2023-601-supplement.pdf]

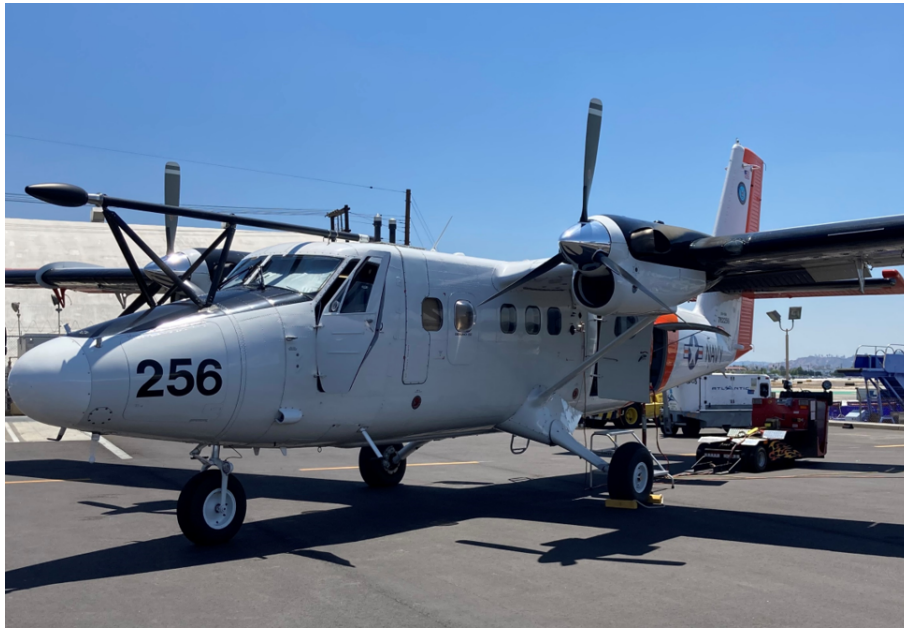

**Figure S1.** NPS Twin Otter aircraft, including the mounted inlet for air sampling.

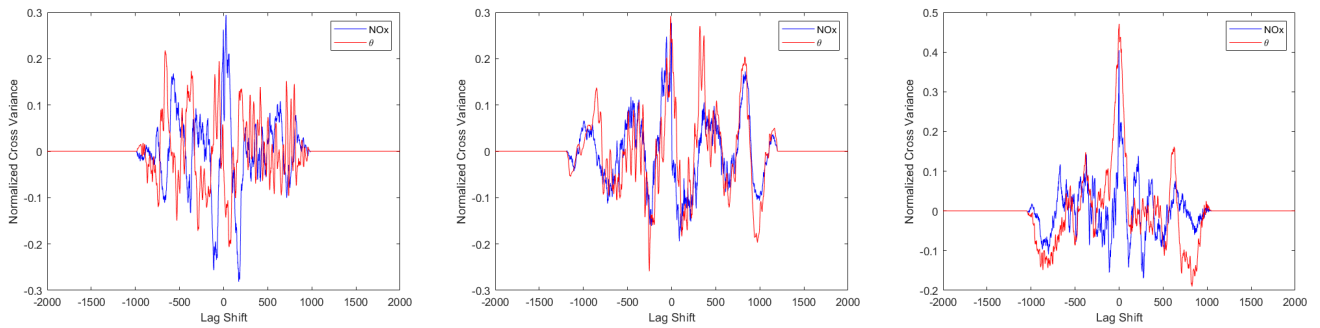

**Figure S2.** Example covariance peak for  $\text{NO}_x$  (green) and potential temperature  $\theta$  (red) with the vertical windspeed for three segments on June 6.

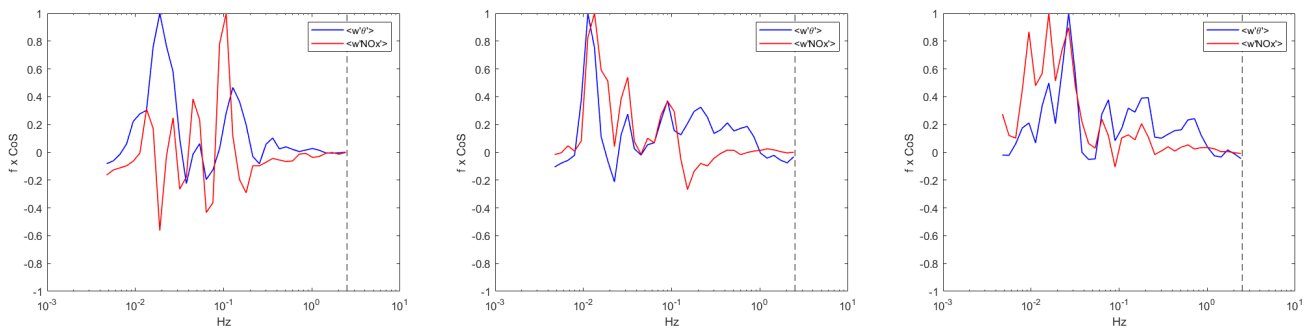

**Figure S3.** Example co-spectra (normalized) for the  $\text{NO}_x$  flux (green) and the heat flux (red) for three segments on June 6.

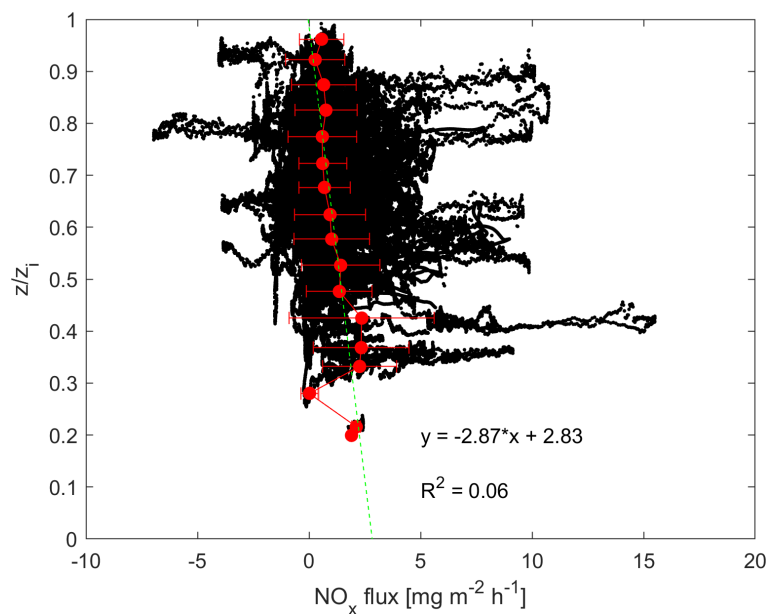

**Figure S4.** Dimensionless altitude  $z/z_i$  versus the  $\text{NO}_x$  flux to investigate vertical divergence. Black dots represent all data points. The green dashed line shows the linear fit of all data points. The red points and errorbars represent the binned means with the  $1\sigma$  variability.

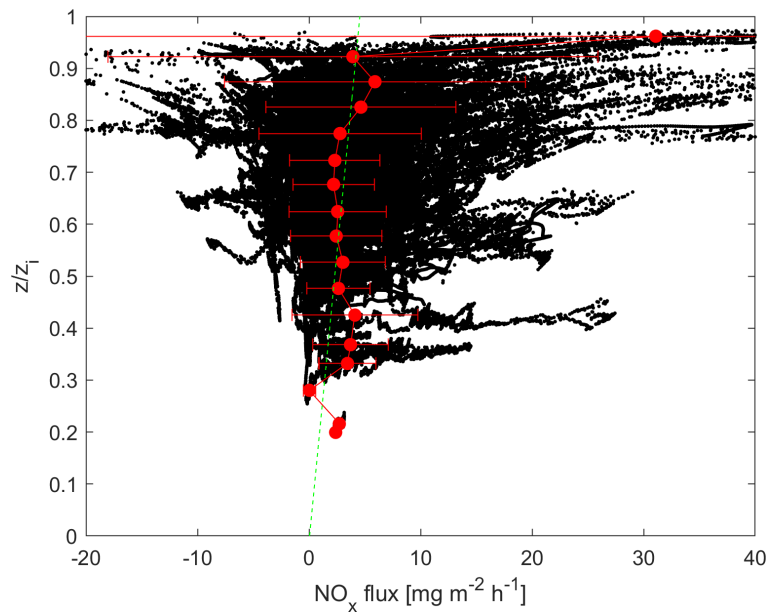

**Figure S5.** Dimensionless altitude  $z/z_i$  versus the corrected  $\text{NO}_x$  flux according to Figure S4. Black dots represent all data points. The green dashed line shows the linear fit of all data points. The red points and errorbars represent the binned means with the  $1\sigma$  variability.

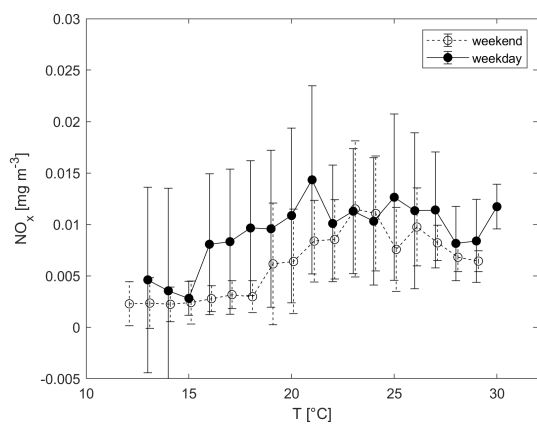

(a)  $\text{NO}_x$  vs T

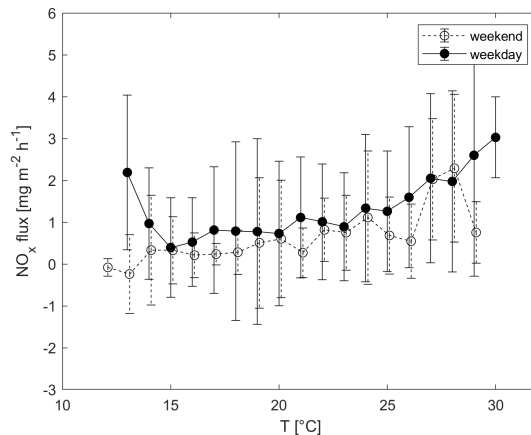

(b)  $\text{NO}_x$  flux vs T

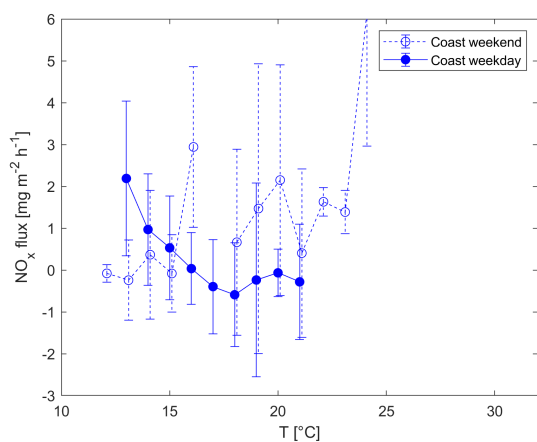

(c) Coast

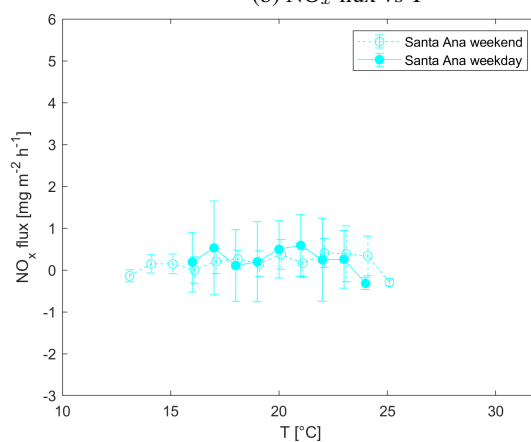

(d) Santa Ana

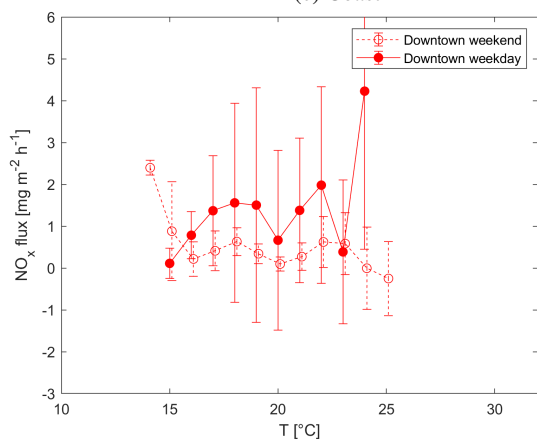

(e) Downtown

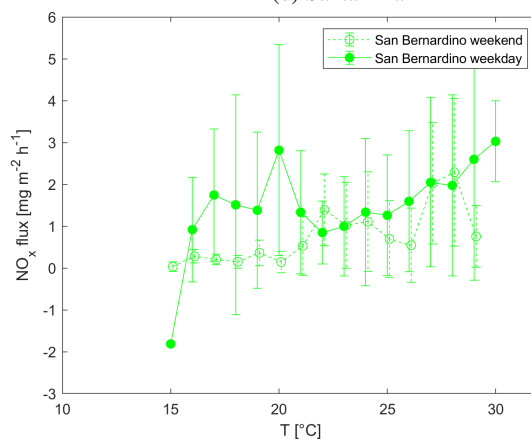

(f) San Bernardino

**Figure S6.** Temperature correlation of  $\text{NO}_x$  concentrations and  $\text{NO}_x$  fluxes for all data points ((a)&(b)) and separated into the four regions ((c)-(f)).

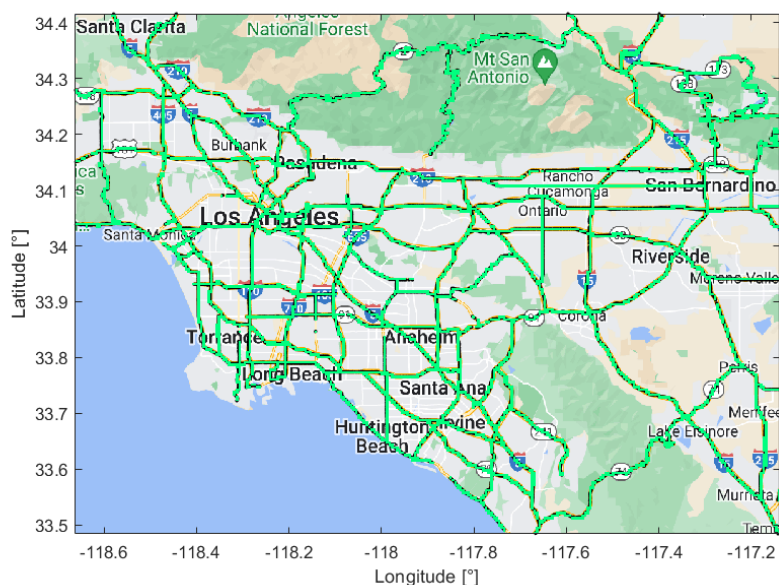

**Figure S7.** Highway emission grid based on the information from the California Department of Transportation (2015). Highway grid cells are shown in green. © Google Maps 2023.

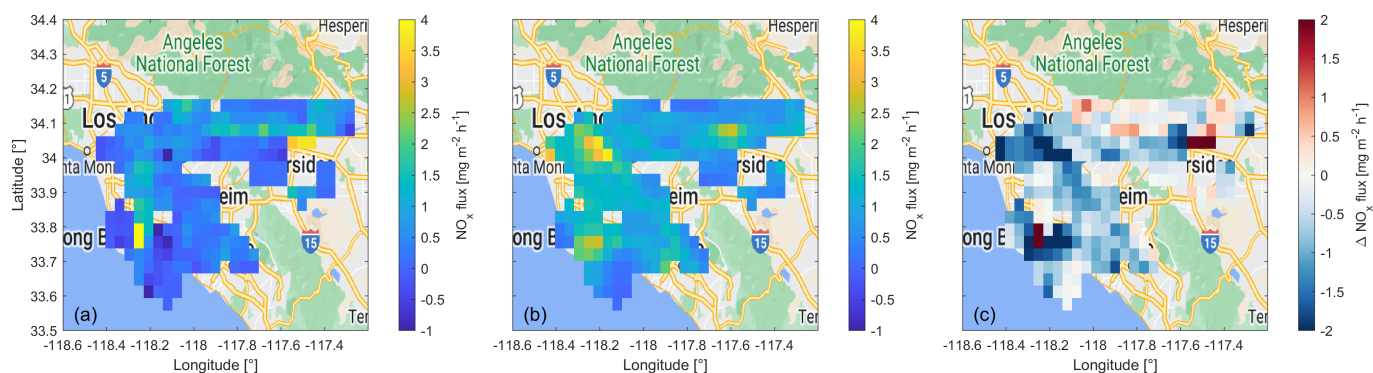

**Figure S8.** Weekend averages of  $\text{NO}_x$  emissions across Los Angeles with a  $4\text{ km} \times 4\text{ km}$  spatial resolution (a) during the RECAP-CA campaign, (b) from the CARB emission inventory and (c) the difference between RECAP-CA and CARB  $\text{NO}_x$  fluxes. © Google Maps 2023.

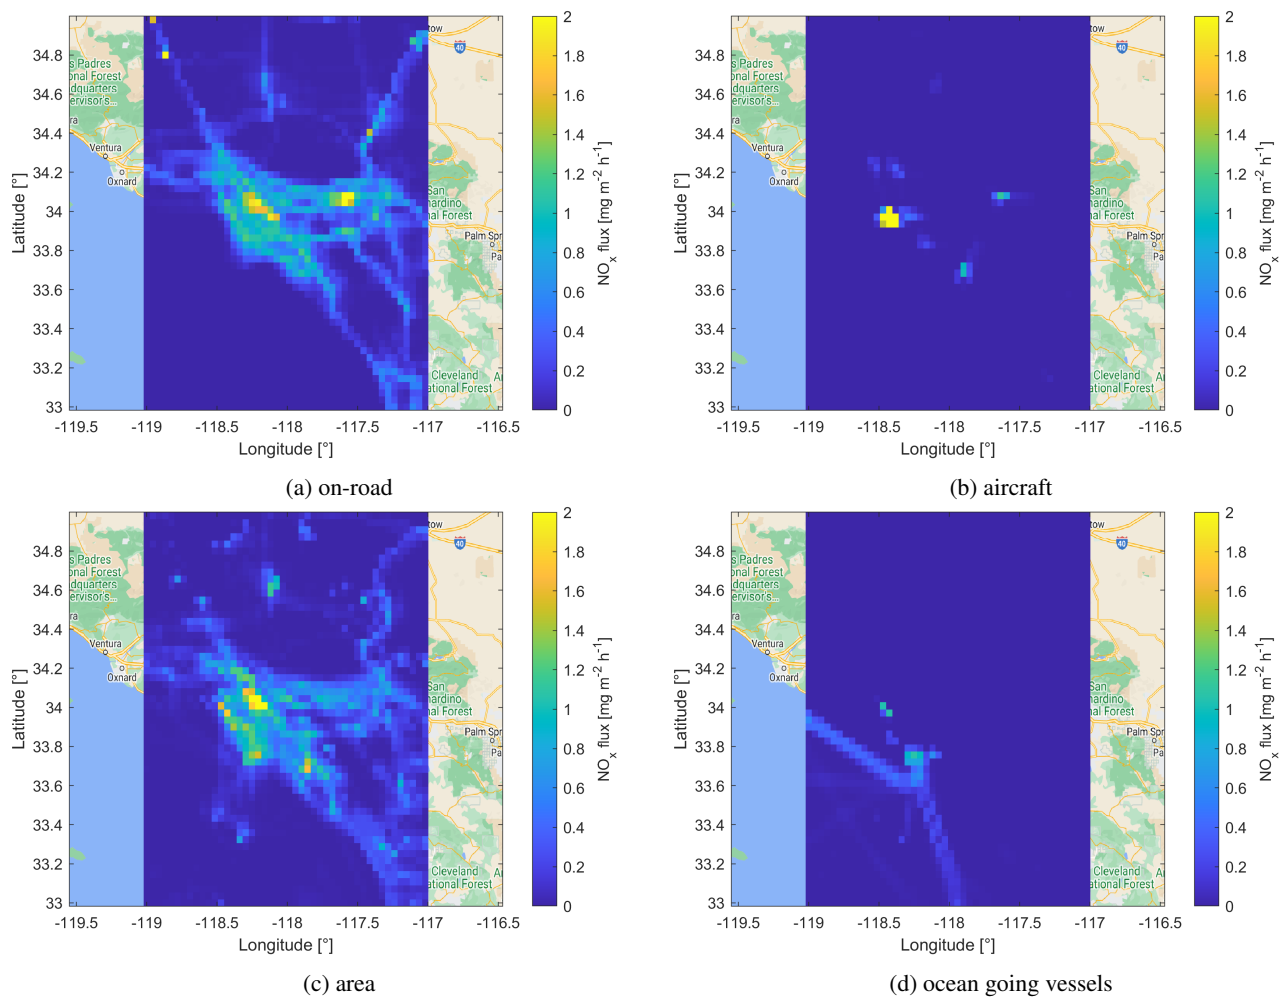

**Figure S9.** CARB emission inventory, separated into different sectors. © Google Maps 2023.

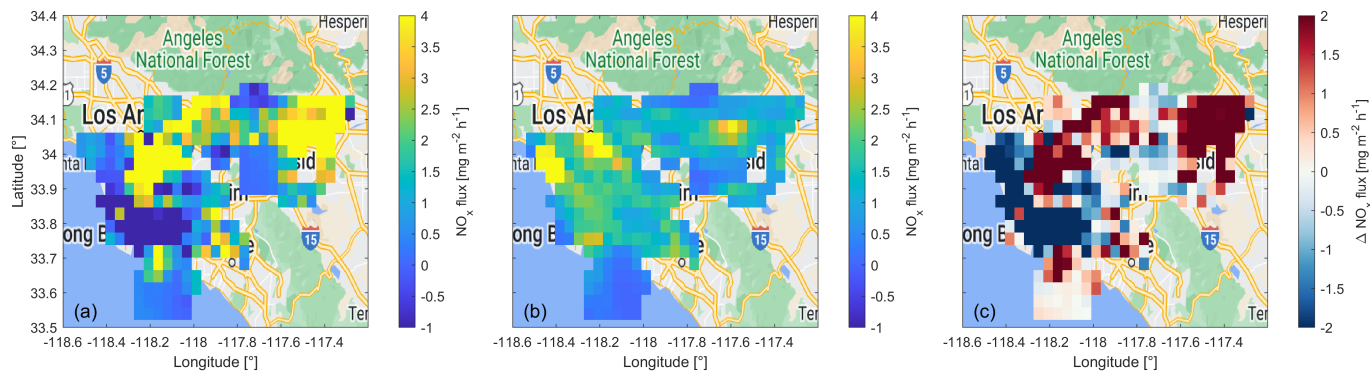

**Figure S10.** Weekday averages of vertical divergence corrected  $\text{NO}_x$  emissions across Los Angeles with a  $4 \text{ km} \times 4 \text{ km}$  spatial resolution (a) during the RECAP-CA campaign, (b) from the CARB emission inventory and (c) the difference between RECAP-CA and CARB  $\text{NO}_x$  fluxes. © Google Maps 2023.

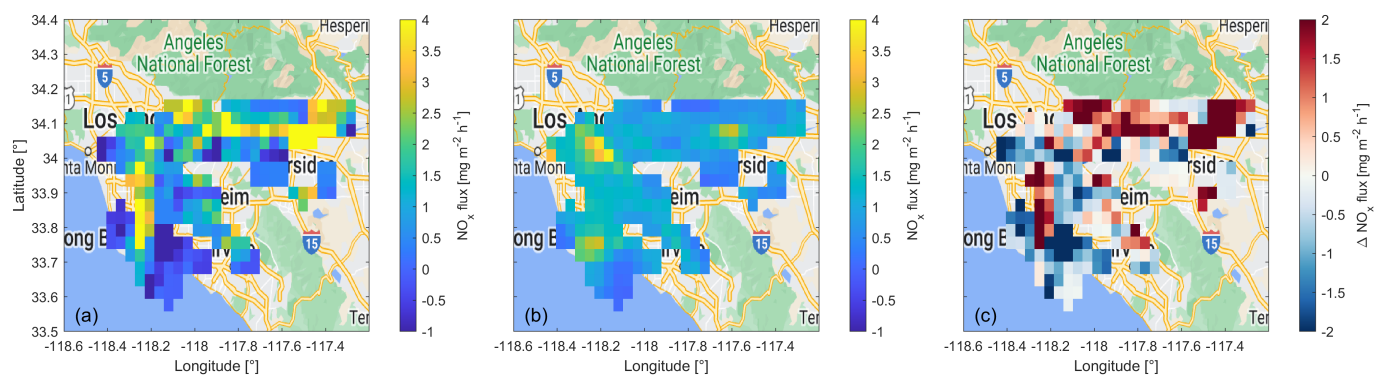

**Figure S11.** Weekend averages of vertical divergence corrected NO<sub>x</sub> emissions across Los Angeles with a 4 km × 4 km spatial resolution (a) during the RECAP-CA campaign, (b) from the CARB emission inventory and (c) the difference between RECAP-CA and CARB NO<sub>x</sub> fluxes. © Google Maps 2023.
